# Supplementary material
Source: publisher figshare collection journal article supplement (https://gsapubs.figshare.com/ndownloader/files/35295736)
Supplement: Supplementary file 1 [file 35295736]

Table S1. Events with Data per Station and Events Culled

| Stations | Events with Data* | Events Culled† |
| --- | --- | --- |
| LD |  |  |
| BRNJ | 1106 | 484 |
| BRNY | 861 | 361 |
| CONY | 151 | 61 |
| CPNY | 1118 | 504 |
| CUNY | 320 | 138 |
| FOR | 1120 | 479 |
| HCNY | 768 | 330 |
| KSCT | 484 | 213 |
| MSNJ | 550 | 257 |
| NPNY | 758 | 202 |
| ODNJ | 799 | 368 |
| PAL | 1534 | 691 |
| PANJ | 424 | 76 |
| TRNY | 219 | 83 |
| UCCT | 211 | 94 |
| N4 |  |  |
| K62A | 215 | 83 |
| L64A | 210 | 74 |
| M63A | 236 | 70 |
| N62A | 231 | 84 |
| NE |  |  |
| BCX | 475 | 210 |
| BRYW | 735 | 321 |
| QUA2 | 690 | 299 |
| TRY | 782 | 360 |
| WES | 811 | 341 |
| WSPT | 411 | 174 |
| YLE | 729 | 307 |
| TA |  |  |
| K95A | 118 | 50 |
| K60A | 118 | 45 |
| K61A | 140 | 51 |
| K62A | 143 | 50 |
| K63A | 129 | 44 |
| L60A | 118 | 39 |
| L61A | 115 | 44 |
| L61B | 345 | 127 |
| L62A | 117 | 42 |
| L63A | 134 | 50 |
| L64A | 142 | 43 |
| L65A | 137 | 43 |
| M60A | 119 | 41 |
| M61A | 137 | 51 |
| M62A | 115 | 43 |
| M63A | 116 | 49 |
| M64A | 132 | 46 |
| M65A | 459 | 187 |
| M66A | 138 | 45 |
| N61A | 113 | 42 |
| N62A | 106 | 47 |
| N63A | 116 | 44 |
| O61A | 131 | 56 |
| US |  |  |
| LSCT | 251 | 99 |
| XA |  |  |
| MM01 | 68 | 52 |
| MM02 | 98 | 73 |
| MM03 | 100 | 76 |
| XO |  |  |
| KICK | 5 | 2 |
| SCCC | 94 | 32 |
| UCON | 8 | 7 |
| UHRT | 7 | 6 |
| VASR | 94 | 35 |
| WICK | 103 | 38 |
| WIND | 94 | 38 |
| XP |  |  |
| CS01 | 88 | 47 |
| CS02 | 75 | 24 |
| CS03 | 209 | 92 |
| CS04 | 73 | 31 |
| CS05 | 199 | 81 |
| CS06 | 140 | 61 |
| CS07 | 145 | 59 |
| CS08 | 145 | 65 |
| CS09 | 62 | 34 |
| CS10 | 41 | 16 |
| CS11 | 0 | 0 |
| CS12 | 109 | 49 |
| CS11 | 126 | 59 |
| CS12 | 218 | 85 |
| CS15 | 96 | 46 |
| *Note:*  *Events with Data includes only the events which contained all three components with full data and do not include any multiples which were discarded.  †Culled data includes all the Events with Data that were subsequently culled due to low signal-to-noise ratios. | | |
